# EP.TH.25

## Common General Surgical Never Events: An In-depth Analysis of Never Events data held by NHS England

Islam Omar<sup>1</sup>, Rishi Singhal<sup>2</sup>, Michael Wilson<sup>3</sup>, Chetan Parmar<sup>4</sup>, Omar Khan<sup>5</sup>, Kamal Mahawar<sup>1</sup>

<sup>1</sup>Bariatric Unit, Department of General Surgery, Sunderland Royal Hospital, South Tyneside and Sunderland NHS Trust, United Kingdom, <sup>2</sup>Birmingham Heartlands Hospital, University Hospital Birmingham NHS Foundation Trust, <sup>3</sup>NHS Forth Valley, <sup>4</sup>Whittington Health NHS Trust, <sup>5</sup>St. George's University Hospitals NHS Foundation Trust

**Background:** There is little available data on common general surgical NE. Lack of this information may have affected our attempts to reduce the incidence of these potentially serious clinical incidents. The purpose of this study was to identify common general surgical NE from the data held by the National Health Service (NHS) England.

**Methods:** We analyzed NHS England NE data from April 2012 to February 2020 to identify common general surgical NE.

**Results:** There was a total of 797 general surgical NE identified under three main categories of Wrong-Site Surgery ( $n=427$ ; 53.58%), Retained Items Post-Procedure ( $n=355$ ; 44.54%) and Wrong Implant/Prosthesis and ( $n=15$ ; 1.88%). We identified a total of 56 common general surgical themes - 25 each in Wrong-Site Surgery and Retained Foreign Body category and 6 in wrong implants.

Wrong skin condition surgery was the commonest wrong-site surgery ( $n=117$ ; 27.4%). There were 18 wrong side chest drains (4.2%) and 18 (4.2%) wrong side angioplasty/angiogram. There were 7 (1.6%) instances of confusion in pilonidal/perianal/perineal surgeries and 6 (1.4%) instances of biopsy of cervix rather than colon or rectum.

Retained surgical swabs were the most common retained items ( $n=165$ ; 46.5%). There were 28 (7.9%) laparoscopic retrieval bags with or without the specimen, 26 (7.3%) chest drain guidewires, 26 (7.3%) surgical needles; and 9 (2.5%) surgical drains. Wrong stents were the most common ( $n=9$ ; 60%) wrong implant followed by wrong breast implants ( $n=2$ ; 13.3%).

**Conclusion:** This study found 56 common general surgical Never Events. Increased awareness of these common themes of NE may ultimately help reduce their incidence.
